# Supplementary material
Source: Research Square preprint supplement (doi:10.21203/rs.3.rs-9111705/v1)
Supplement: Supplementary file 1 [file f8ad5e6e5a36a5ec3e1ec552.docx]

**Supplementary File 1**

Study title: Dental Self-Medication and the Systemic Access Paradox in an Urban Turkish Clinical Population

Instructions: Please mark the most appropriate response for each item. For questions marked as multiple response, more than one answer may be selected.

**Section 1. Sociodemographic characteristics and oral health behaviors**

**1. Sex**

[ ] Male

[ ] Female

**2. Age group**

[ ] 18-30

[ ] 30-45

[ ] 45-65

[ ] 65+

**3. Educational level**

[ ] Primary school

[ ] Secondary school

[ ] High school

[ ] Higher education

**4. Income status**

[ ] Income less than expenses

[ ] Income equal to expenses

[ ] Income more than expenses

**5. Marital status**

[ ] Single

[ ] Married

**6. Occupational status**

[ ] Unemployed

[ ] Employed in the non-health sector

[ ] Employed in the health sector

[ ] Retired

**7. Do you have health insurance coverage?**

[ ] Yes

[ ] No

**8. Place of residence**

[ ] City center

[ ] District center

[ ] Village / rural area

**9. How often do you visit the dentist?**

[ ] Problem-oriented only

[ ] Once a year

[ ] Twice a year

[ ] Once every 2-3 years

[ ] Once every 4-5 years

**10. When you have a dental problem, who or what is your first point of contact?**

[ ] Dentist

[ ] Social circle (relatives/friends)

[ ] Pharmacy

[ ] Internet

[ ] Other

[ ] None

**Section 2. Dental self-medication (D-SM) prevalence and behavioral tendency**

**11. During the past 6 months, have you practiced dental self-medication (D-SM)?**

[ ] Yes

[ ] No

[ ] Not sure

**12. During the past 6 months, have you used any non-prescription medication or product for a dental problem?**

[ ] Yes

[ ] No

**13. How likely are you to use D-SM if you experience a dental problem in the next 6 months?**

[ ] Highly unlikely

[ ] Unlikely

[ ] Undecided

[ ] Likely

[ ] Very likely

**Section 3. Reasons, clinical triggers, and advice sources for D-SM**

**14. If you practiced D-SM, what were your reasons?** *(Multiple responses allowed)*

[ ] Perceived convenience/efficacy (fast, easy, effective and safe)

[ ] Difficulty obtaining a dental appointment

[ ] Perceived low severity (not serious enough to seek care)

[ ] Dental anxiety / fear of procedures

[ ] Time constraints

[ ] Cost-related barriers (financial constraints)

[ ] Prior successful use of the same medication

[ ] Embarrassment about oral condition

[ ] Preventive use (to "boost immunity")

[ ] Other

**15. Which dental problem(s) led you to practice D-SM?** *(Multiple responses allowed)*

[ ] Toothache

[ ] Dental caries

[ ] Gingival bleeding

[ ] Gingival pain

[ ] Gingival swelling

[ ] Oral ulcers

[ ] Facial swelling

[ ] Halitosis

[ ] Tooth whitening

[ ] Preventive use

[ ] Other

**16. What was your source of advice or information for D-SM?** *(Multiple responses allowed)*

[ ] Herbalist / traditional medicine shop

[ ] Recommendation from social circle

[ ] Other healthcare professionals

[ ] Media sources

[ ] Previous dental treatment experience

[ ] Pharmacy

[ ] Other

**Section 4. Self-treatment modalities and use patterns**

**17. What was the first D-SM method you used?**

[ ] Pharmacological agents

[ ] Herbal remedies

**18. If you preferred herbal remedies over pharmacological agents, why?**

[ ] Fewer side effects

[ ] Perceived greater safety

**19. Which herbal remedy/remedies did you use for D-SM?** *(Multiple responses allowed)*

[ ] Clove

[ ] Garlic/onion

[ ] Rinsing with thyme water

[ ] Rinsing with sage tea

[ ] Application of aloe vera gel

[ ] Application of St. John's wort oil

[ ] Rinsing with alcohol

[ ] None of the listed methods

[ ] Other

**20. How long did you use the herbal remedy/remedies for D-SM?**

[ ] A few days

[ ] A few weeks

[ ] Until symptom relief

[ ] Regularly

**21. Which pharmacological agent(s) did you use for D-SM?**

[ ] Analgesics

[ ] Antibiotics

[ ] Aspirin

[ ] Other

**22. How long did you use the pharmacological agent(s) for D-SM?**

[ ] A few days

[ ] A few weeks

[ ] A few months

[ ] Until symptom relief

**Section 5. Perceptions, safety, and communication**

**23. Would you recommend D-SM to others?**

[ ] Yes

[ ] No

[ ] Undecided

**24. How effective do you think D-SM was?**

[ ] Symptomatic relief

[ ] Not sure

[ ] Effective

[ ] Not effective

**25. Did you experience any adverse effects after practicing D-SM?**

[ ] Yes

[ ] No

[ ] Undecided

**26. Compared with professional dental treatment, do you think D-SM was effective?**

[ ] Yes

[ ] No

[ ] Undecided

**27. Did you inform your dentist that you had practiced D-SM?**

[ ] Yes

[ ] No

*Abbreviation: D-SM = dental self-medication.*
